# Supplementary material for: IRAK1 is a novel DEK transcriptional target and is essential for head and neck cancer cell survival
Source: PubMed Central journal article supplement (PMC4791239; doi:10.18632/oncotarget.6028), 2015-10-26
Supplement: oncotarget-06-43395-s001.pdf [file oncotarget-06-43395-s001.pdf]

## SUPPLEMENTARY TABLES AND FIGURES

**Supplementary Table S1: Transcription factor binding site (TFBS) analysis for genes up-regulated in UMSCC1 and UMSCC47**

| TF binding site ID         | log <i>p</i> -value | Up-regulated Genes                                                                                                                                                                                                                                                                                                                                                                                                           |
|----------------------------|---------------------|------------------------------------------------------------------------------------------------------------------------------------------------------------------------------------------------------------------------------------------------------------------------------------------------------------------------------------------------------------------------------------------------------------------------------|
| V\$P53_DECAMER_Q2          | 2.972               | ABCA12, AKAP6, ARHGEF37, ARHGEF6, BCL11B, DOCK9, FLRT1, GJB4, HCAR2, HOXB3, KRT15, LRP1, PIM1, PITPNC1, PPL, PRDM12, PTAFR, PTPRG, RAP2B, RARB, ST5, TBC1D8, TECTA                                                                                                                                                                                                                                                           |
| V\$E12_Q6                  | 2.610               | ABLIM3, ALDH1A2, ARVCF, CAMK2A, COL4A3, CORO2B, CPZ, CRELD1, GFAP, GJB2, HIF3A, ITGB4, MDGA1, MYH14, NFATC4, NPEPPS, POU2F3, SASH1, SELL, SORCS2, SPTB                                                                                                                                                                                                                                                                       |
| RTAAACA_V\$FREAC2_01       | 2.452               | ABCA1, ABLIM3, ACVR1C, ADAMTS13, ARHGEF6, ARID4A, ASAH1, BACH2, BCL11B, BIK, C1QTNF3, CCND1, CDKN1B, DAPP1, DOCK3, EMP1, EPHB3, FBXW7, GATS, GCNT2, GPR110, GPR4, GRK5, HCAR2, HCAR3, HOXA5, HSPG2, IL16, L3MBTL1, LEMD1, LRP1, MAML3, MGAT4B, MMP13, MN1, NEBL, NGEF, NLGN3, NR4A2, PBXIP1, PCDHGA5, PHEX, PIK3IP1, PITPNC1, PLAG1, PLAU, PPAP2B, PRDM1, PROX1, RP1, RPS6KA5, SDCBP2, SLC34A3, SLC4A1, SOCS1, SPRY4, TCF7L2 |
| V\$TAL1BETAE47_01          | 2.110               | ABHD16A, ASB4, DTX2, HOXB6, HRK, KCNIP2, NPR2, OMG, PBXIP1, PCDH1, PCDH12, PHEX, PLXNA3, PPAP2B, PYY, RCAN2, RNF19A, SCN1B, UPK2, WNT9A                                                                                                                                                                                                                                                                                      |
| V\$IRF_Q6                  | 1.932               | ACSL5, ARHGEF6, CCND1, DAPP1, ESR1, HLA-C, HLA-F, HOXB3, MLLT3, MUSK, NCF1, NPEPPS, PLXNC1, PSMB10, SELL, SOCS1, TCF7L2, ZBP1                                                                                                                                                                                                                                                                                                |
| V\$AREB6_01                | 1.876               | CDKN1B, CEL, CRELD1, CSAD, CYP26B1, FBXO24, FXYD3, GAD1, HOXB6, IQGAP2, MAP3K5, PCDHGA5, PLAG1, PROX1, RRAD, S100A9, SLC4A11, STRC, STX1A, VWF                                                                                                                                                                                                                                                                               |
| KRCTCNNNNMANAGC_UNKNOWN    | 1.816               | HIST1H1C, HIST1H2AC, HIST1H2AJ, HIST1H2BD, HIST1H2BJ, HIST2H2AC, HIST2H2BE, HIST3H2BB                                                                                                                                                                                                                                                                                                                                        |
| V\$P53_Q2                  | 1.809               | ABCA12, ACSL5, AKAP6, ASIC4, BCL11B, FLRT1, GAD1, GCNT2, HCAR2, KRT15, NR4A3, PIK3R2, PITPNC1, PPL, PRDM12, PTPRG, RARB, ST5, TMC7                                                                                                                                                                                                                                                                                           |
| TGANNYRGCA_V\$TCF11MAFG_01 | 1.770               | ABCC6, ANGPTL4, ATL1, BCL6, CBX6, CLCN5, CPZ, DRP2, DTX2, ESR1, FBLN2, LRP1, NR4A3, OMG, PFKFB1, PIM1, PRDM1, RAG1, SLC22A18, TFEC, TREML2                                                                                                                                                                                                                                                                                   |
| TGTTTGY_V\$HNF3_Q6         | 1.760               | ALDH1A2, ARHGEF6, ASB4, BCL11B, BCL6, CBX6, CDH12, CNTNAP2, CSAD, DOCK9, DTX2, EFNA1, ESR1, FCGBP, FLRT1, GJB4, HCAR1, HCAR2, HCAR3, HIST1H1C, HIST1H2BD, HOXB3, HS3ST5, IL16, IQGAP2, ITM2B, MAST4, MGAT4B, MUSK, NFATC4, NOS3, NR4A3, OMG, PDGFRA, PHEX, PRDM1, PTPRG, SHC3, SLC4A11, SNCG, SPAG8, ST5, TCF7L2, TFEC                                                                                                       |

(Continued)

| TF binding site ID     | log <i>p</i> -value | Up-regulated Genes                                                                                                                                                                                                                                                                      |
|------------------------|---------------------|-----------------------------------------------------------------------------------------------------------------------------------------------------------------------------------------------------------------------------------------------------------------------------------------|
| V\$AML1_01             | 1.701               | ACSL5, AKAP3, ANXA8L2, CD6, EMP1, GRK5, MMP13, MMP14, MPL, MR1, PDZK1, PLXNC1, RAG1, S100A9, SCEL, SLC37A2, STRC, TLL2                                                                                                                                                                  |
| V\$AML1_Q6             | 1.701               | ACSL5, AKAP3, ANXA8L2, CD6, EMP1, GRK5, MMP13, MMP14, MPL, MR1, PDZK1, PLXNC1, RAG1, S100A9, SCEL, SLC37A2, STRC, TLL2                                                                                                                                                                  |
| YATGNWAAT_V\$OCT_C     | 1.680               | ACBD4, ALDH1A2, ARHGAP4, CCND1, DNAH5, EPHB3, FBXO24, GPR4, HIST1H2AC, HIST2H2AC, HIST2H2BE, HOXA5, HOXB6, MMP17, NR4A3, PFKFB1, PIWIL4, POU2F3, PRDM1, RARB, RNASE4, SASH1, SEMA6C, SH3BGR, WNT9A                                                                                      |
| V\$PPARA_02            | 1.644               | AHCYL2, CBX6, CDH17, EPHB1, HOXA5, MNT, NLGN3, PSCA, RTN2, SERPINF2, UCN2                                                                                                                                                                                                               |
| V\$PPARA_01            | 1.640               | CD36, PAPLN, PDZK1, PTPRG, ZNF547                                                                                                                                                                                                                                                       |
| V\$FREAC4_01           | 1.603               | ADAMTS13, ALDH1A2, EMP1, HSPG2, MAST4, PHEX, PRDM1, PTAFR, SLC34A3, SPRY4, TCF7L2, TECTA                                                                                                                                                                                                |
| RYCACNNRNRNCAG_UNKNOWN | 1.543               | AHCYL2, FYB, IL17RE, MB, PBXIP1, RHOF, UPK2                                                                                                                                                                                                                                             |
| V\$NFKAPPAB65_01       | 1.480               | COL11A2, CSF1R, CYP2D6, DSC2, GNG4, GRK5, KCNN2, KRT23, PCDH12, POU2F3, PRDM12, PTGES, SDC4, TCEA2, TRIB2, TSLP, ZMYND15                                                                                                                                                                |
| V\$GATA_Q6             | 1.475               | ABCA12, COL4A3, DENND1B, EPB42, FMO1, GPR116, HOXB6, HS3ST5, PDGFRA, PFKFB1, PLAG1, PVRL4, SLC4A1, SPRY4, SYT7                                                                                                                                                                          |
| TGCCAAR_V\$NF1_Q6      | 1.470               | ABCA9, ABLIM2, AGER, AQP11, ARHGEF6, BACH2, BCL6, C1QTNF3, C4A, C4B, C6orf223, CLCN5, COL4A3, DDO, EIF4EBP3, ESR1, FLRT1, GCNT2, GFAP, GNAT2, IL16, INHBC, MAST4, MPL, MUSK, NAPB, NLGN3, PAPLN, PAQR6, PBXIP1, PHEX, PLXNC1, PROX1, RARB, RPS6KA5, RRAD, SPRY4, SYTL2, TSLP, VNN2, XDH |
| V\$PAX4_03             | 1.442               | AGER, ANXA4, CBX6, COL11A2, FBXO24, HIF3A, HOXB6, KCNN2, LRP1, MMP14, MNT, MPL, NFATC4, NLGN3, PPAP2B, PRDM1, SERPIN1, TRIM46                                                                                                                                                           |
| RTTTNNNYTGGM_UNKNOWN   | 1.390               | ALDH1A2, ESR1, FHIT, LRP1, MARCO, MAST4, NOS3, PHEX, PTPRCAP, PTPRG, STX6, TECTA                                                                                                                                                                                                        |
| TGACATY_UNKNOWN        | 1.376               | ACVR1C, AKAP3, AOC2, ARHGAP4, ARHGEF6, ASB11, ASB4, CLCN5, DSC2, FAM71F1, FBXO32, HOXB3, ITM2B, KCNN2, LEMD1, LRP1, MLLT3, MNT, NEBL, NFATC4, PBXIP1, PDGFRA, PITPNC1, PLAG1, PRDM1, PTPRC, RAPS, RARB, RCAN2, RNF19A, RRAD, SASH1, SH3BGR, SLC4A1, ST5, STX6, TBC1D8, TECTA            |
| V\$CEBP_01             | 1.358               | BCL11B, CLDN16, CSAD, CYP2D6, DOCK9, EVI2A, GCNT2, GSTA4, HOXB3, HOXB6, MNT, NFATC4, PFKFB1, PLXNC1, PRDM1, RNF19A, S100A9, ST5                                                                                                                                                         |

(Continued)

| TF binding site ID      | log <i>p</i> -value | Up-regulated Genes                                                                                                                             |
|-------------------------|---------------------|------------------------------------------------------------------------------------------------------------------------------------------------|
| V\$OCT_C                | 1.358               | ARHGAP4, EPHB3, FBXO24, GCNT2, GPR4, HIST1H2AC, HIST2H2AC, HIST3H2BB, HOXB3, MMP17, PFKFB1, POU2F3, PRDM1, SASH1, SEMA6C, SH3BGRL, STAT4, TLL2 |
| GATAAGR_V\$GATA_C       | 1.336               | ABCA12, ADPRHL1, EPB42, FCGBP, FMO1, HS3ST5, HYAL3, KRT15, KRT23, LEMD1, MLLT3, MST1, NEBL, PFKFB1, PLAG1, PTPRC, SLC34A3, SLC4A1, SPRY4, SYT7 |
| V\$COREBINDINGFACTOR_Q6 | 1.326               | ADD1, ANXA8L2, B3GNT5, CD6, CYGB, EMP1, EVI2A, HOXB6, IL17RE, MMP13, MPL, NR4A3, PDZK1, PITPNC1, RAG1, S100A9, SLC37A2, STRC                   |
| CCANNAGRKGGC_UNKNOWN    | 1.323               | ACBD4, GAD1, GRK5, LRP1, MB, PCDH12, POU2F3, SORCS2, UPK2                                                                                      |
| V\$HNF4_Q6              | 1.307               | ABCA12, ARHGEF37, C4A, C4B, EMP1, FBXW7, HOXA5, PDZK1, PRDM1, PROX1, PTPRH, RARB, SLC5A2, SLPI, SP140, SPINT1, SULT2B1                         |

Enriched TFBS were found using the ToppGene server

**Supplementary Table S2: Transcription factor binding site analysis for genes down-regulated in UMSCC1 and UMSCC47**

| TF binding site ID       | log <i>p</i> -value | Down-regulated Genes                                                                                                                                                                                                                                                                                                                                                                                                                                                                  |
|--------------------------|---------------------|---------------------------------------------------------------------------------------------------------------------------------------------------------------------------------------------------------------------------------------------------------------------------------------------------------------------------------------------------------------------------------------------------------------------------------------------------------------------------------------|
| V\$SRF_C                 | 3.170               | ACVR1, CYR61, DIXDC1, EMILIN2, HOXA3, MAPK14, MYL9, NR2F2, PPP2R3A, RAB30, SCOC, TAGLN, THBS1, TNNC1, ZAK                                                                                                                                                                                                                                                                                                                                                                             |
| V\$SRF_Q4                | 2.907               | DIXDC1, EDN1, EMILIN2, HOXA3, MAPK14, MYL9, NR2F2, PPP2R3A, RAB30, SCOC, TAGLN, THBS1, TNNC1, VGF, ZAK                                                                                                                                                                                                                                                                                                                                                                                |
| CTTTAAR_UNKNOWN          | 2.802               | ANKRD28, ATP5SL, AXL, CREB3L1, CYR61, DCX, DOCK11, EDN1, EGLN3, ETHE1, FPGT, GAN, GNG11, GNGT1, HOXA3, HOXA4, HPS3, KCTD8, KIRREL3, KTN1, MAPKAPK3, NELL2, NR2F2, NR5A2, PDE3B, PLXDC2, PPM1E, PPP2R3A, PDK1, RBM24, SCD, SCML1, SMARCA1, SOCS2, STEAP2, TAGLN, TBX2, TCF4, TGFB2, VGF, ZNF593                                                                                                                                                                                        |
| TGGAAA_V\$NFAT_Q4_01     | 2.689               | ANKRD28, ANTXR1, APOM, ARHGEF25, CALB1, CCNI, CD86, CDC42EP3, CKS1B, CNIH1, COL2A1, CXCL10, CYR61, DNMT3B, EFN3, ERBB4, FAM155B, FZD7, GDA, GFOD1, GPR150, HOXA13, HOXA3, HOXA4, HSPH1, HTR7, IL6, IL7R, KCNQ5, KIRREL3, LRRC2, MGP, MTX2, NGF, NINJ2, NR5A2, NRAS, PAK1IP1, PDE3B, PIGW, POLG2, PPP2CA, PPP2R3A, RAB30, RCN3, RNF128, SCR3, SKP2, SLA, SLC43A1, SMYD2, SNX12, SOCS2, STEAP2, SV2A, TBX2, TCF12, TCF4, TGFB2, TJP2, TNFRSF11B, TUB, VEGFC, VGF, XPNPEP1, ZIC5, ZNF593 |
| CCAWWNAAGG_V\$SRF_Q4     | 2.622               | DIXDC1, RAB30, SCOC, TAGLN, TCF4, THBS1, TNNC1, ZAK                                                                                                                                                                                                                                                                                                                                                                                                                                   |
| V\$COUP_01               | 2.506               | APOM, CKS1B, CNIH1, DOCK11, EFN3, FAM155B, HOXA3, IL21R, NR2F2, NYAP1, PDE3B, PPP2R3A, RPL34, SMYD5, STEAP2                                                                                                                                                                                                                                                                                                                                                                           |
| V\$ER_Q6_02              | 2.506               | ADAMTS15, CAPN12, CD37, DACT2, DCX, FHL1, HOXA3, HPCAL4, KIRREL3, MTX2, NR2F6, PPM1E, SMARCA1, STEAP2, TOMM40                                                                                                                                                                                                                                                                                                                                                                         |
| V\$EN1_01                | 2.073               | ERBB4, FHL1, HOXA4, HTR7, MAPK14, NRAS, PEX2, TCF4                                                                                                                                                                                                                                                                                                                                                                                                                                    |
| V\$MYC_Q2                | 2.068               | CA14, COL2A1, HPCAL4, LDHA, NRAS, PFDN2, SC5D, SHMT2, SLC43A1, TGFB2, ZNF593                                                                                                                                                                                                                                                                                                                                                                                                          |
| V\$NMYC_01               | 1.978               | ANGPT2, BCL2, CA14, COL2A1, GJA1, MAPKAPK3, NRAS, RAB30, RNF128, SC5D, SLC43A1, SOCS5, VGF, ZCCHC7                                                                                                                                                                                                                                                                                                                                                                                    |
| V\$OCT1_01               | 1.978               | CDC42EP3, CYR61, EGLN3, HOXA3, HPCAL4, IRAK1, LHX6, NR2F2, PPP2R3A, PYGO1, SLC19A3, SLC7A11, TCF12, TCF4                                                                                                                                                                                                                                                                                                                                                                              |
| RYTGCNNRGNAAC_V\$MIF1_01 | 1.826               | BTG4, EFN3, HMGCS1, HSF1, LHX6, ZNF593                                                                                                                                                                                                                                                                                                                                                                                                                                                |
| V\$SMAD_Q6               | 1.813               | BCL2, CCNI, CKS1B, GARNL3, KCNQ5, LHX6, NYAP1, PRX, SMARCA1, SMYD2, SNX12, SYT11, TAGLN                                                                                                                                                                                                                                                                                                                                                                                               |
| V\$NFAT_Q4_01            | 1.690               | ANKRD28, HOXA3, KCNQ5, KIRREL3, MRPL30, NR5A2, PAK1IP1, PDE3B, PPP2R3A, RNF128, SCR3, SLA, TJP2                                                                                                                                                                                                                                                                                                                                                                                       |
| V\$NRF2_01               | 1.680               | BCL2, C11orf84, CKS1B, E2F4, FBXO22, HSPH1, NRAS, PAFAH1B2, RPL34, TIMM8B, TOMM40, ZNF22                                                                                                                                                                                                                                                                                                                                                                                              |
| CACGTG_V\$MYC_Q2         | 1.618               | ANGPT2, BEX2, CA14, COL2A1, DZIP1, GAR1, GJA1, HOXA3, HOXA4, HPCAL4, HPS3, HSPH1, KCNQ5, KIAA1033, LDHA, MAPKAPK3, NPTX1, NRAS, PDP2, PDPR, PFDN2, PIGW, RAB30, RNF128, RRS1, SC5D, SHMT2, SLC43A1, SOCS2, SOCS5, TBC1D5, TCF4, TGFB2, VGF, ZCCHC7, ZNF593                                                                                                                                                                                                                            |

(Continued)

| TF binding site ID     | log <i>p</i> -value | Down-regulated Genes                                                                     |
|------------------------|---------------------|------------------------------------------------------------------------------------------|
| V\$MYCMAX_02           | 1.603               | ANGPT2, APLN, COL2A1, DZIP1, HOXA3, HSPH1, KCNQ5, LRRC2, RAB30, RNF128, TCF4, TGFB2, VGF |
| AAGWWRNYGGC_UNKNOWN    | 1.583               | ANKRD28, HOXC10, IRAK1, NRAS, PPM1E, RFC1, SMYD5                                         |
| TAAWWATAG_V\$RSRFC4_Q2 | 1.577               | BEX2, GRB14, HOXA4, KCNQ5, KTN1, PPP2R3A, SV2A, TCF4, TNNC1                              |
| V\$CEBP_Q3             | 1.516               | CYR61, DYRK3, EFNA5, GPLD1, NR2F2, PPM1E, RAB30, SNX12, TCF12, TGFB2, WNT10B, ZAK        |
| V\$RSRFC4_Q2           | 1.501               | ADAM11, BNIP3, CDC42EP3, KCNQ5, KTN1, MRPS23, PTPN1, SCML1, SLCO2A1, SV2A, TNNC1         |
| V\$POU3F2_02           | 1.460               | BBX, CYR61, DIXDC1, HOXA3, HOXA4, HPCAL4, IRAK1, LHX6, NRAS, OLFML2B, PAK1IP1, PDE3B     |
| V\$STAT5A_03           | 1.460               | BBX, GPR150, HOXA3, HOXA4, HOXC10, MAPK14, PDE3B, PLXDC2, PPP2R3A, SV2A, TCF4, TNFRSF11B |
| V\$MEF2_Q6_01          | 1.460               | ADAM11, ANGPT2, CDC42EP3, GAN, GRB14, KCNQ5, KTN1, LRRC2, PRX, SMARCA1, SV2A, TNNC1      |
| V\$ELK1_02             | 1.457               | CKS1B, DDIAS, FBXO22, MTX2, NRAS, OGG1, RFC4, TIMM8B, TOMM40, TRO, ZNF22                 |
| WWTAAAGGC_UNKNOWN      | 1.456               | BBX, DCX, ETHE1, IRAK1, MYL9, NR2F2, NRAS, TBX2                                          |
| V\$CEBP_Q2             | 1.442               | EDN2, LHX6, MAPK14, NR2F2, PDE3B, PTX3, PYGO1, RRM2B, SKP2, TCF12, TCF4                  |
| GAANYNYGACNY_UNKNOWN   | 1.430               | CKS1B, GDA, NR2F2, SUMO1, TCF12                                                          |
| V\$FOXO3_01            | 1.428               | ANKRD28, CYR61, DIXDC1, HOXA3, KCNQ5, NRAS, PRICKLE2, RNF128, SLC39A8, TGFB2             |
| V\$SRF_Q6              | 1.420               | DIXDC1, EMILIN2, HOXA3, LDHA, MYL9, NR2F2, PPP2R3A, SCOC, TAGLN, THBS1, TNNC1, ZAK       |
| V\$OCT1_05             | 1.394               | BCL2, EDN1, HOXA3, IL6, LHX6, NR2E1, PPM1E, PPP2R3A, SCML1, SLC19A3, SLC7A11, TCF12      |
| V\$USF_Q6_01           | 1.372               | APLN, HOXA3, KIAA1033, NPTX1, NRAS, PDP2, PFDN2, SC5D, SLC43A1, SOCS5, VGF               |
| V\$ATF1_Q6             | 1.372               | CCNI, CD37, DOK1, DYRK3, HOXA4, HOXC10, KCTD8, LDHA, NR2E1, RRM2B, VGF                   |
| V\$CP2_02              | 1.358               | CDC42EP3, DCX, DDIT4, FOXL2, RAB30, RNF121, TBC1D5, TBX2, TNNC1, WNT10B, XPNPEP1         |
| V\$USF_02              | 1.342               | APLN, CA14, CYR61, FAM155B, NPTX1, NYAP1, PFDN2, RFC1, RNF128, TCF12, TGFB2, UBE2L6      |
| V\$SRF_Q5_01           | 1.331               | DIXDC1, EMILIN2, MAPK14, MYL9, NR2F2, NRAS, PPP2R3A, SCOC, TAGLN, THBS1, ZAK             |
| V\$IK1_01              | 1.317               | CD86, IL6, LHX6, MMP16, NEK4, NR2F6, RNF128, SMYD2, SOCS2, TNFSF18, VGF, ZIC5            |

Enriched TFBS were found using ToppGene server

**Supplementary Table S3: Transcription factor binding site analysis for genes differentially expressed in both UMSCC1 and UMSCC47, but oppositely regulated (up vs. down)**

| TF binding site ID | log <i>p</i> -value | Oppositely-Regulated Genes                                                                                                      |
|--------------------|---------------------|---------------------------------------------------------------------------------------------------------------------------------|
| V\$GATA6_01        | 1.567               | BCL6, BTG2, CLEC18C, COL4A3, DENND1B, FMO1, HOXB3, HOXB6, HS3ST5, KRT15, KRT23, PDGFRA, PFKFB1, PTPRG, PYY, RNF112, SPRY4, SYT7 |

Enriched TFBS were found using ToppGene server

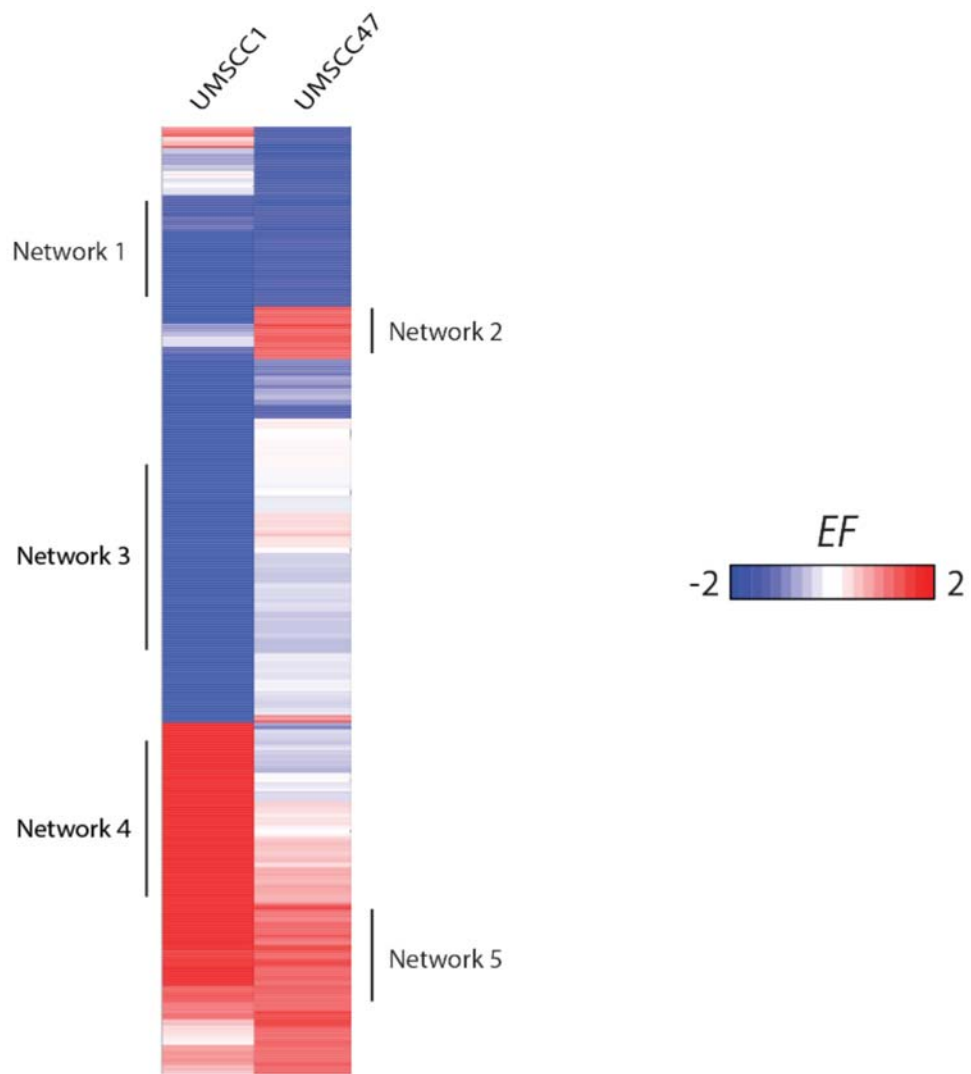

**Supplementary Figure S1:** Network analysis was performed with Netwalker software on UM5CC1 and UM5CC47 RNA-Seq data. Labeled Networks 1-5 can be seen in expanded views in Supplementary figures 2-6.

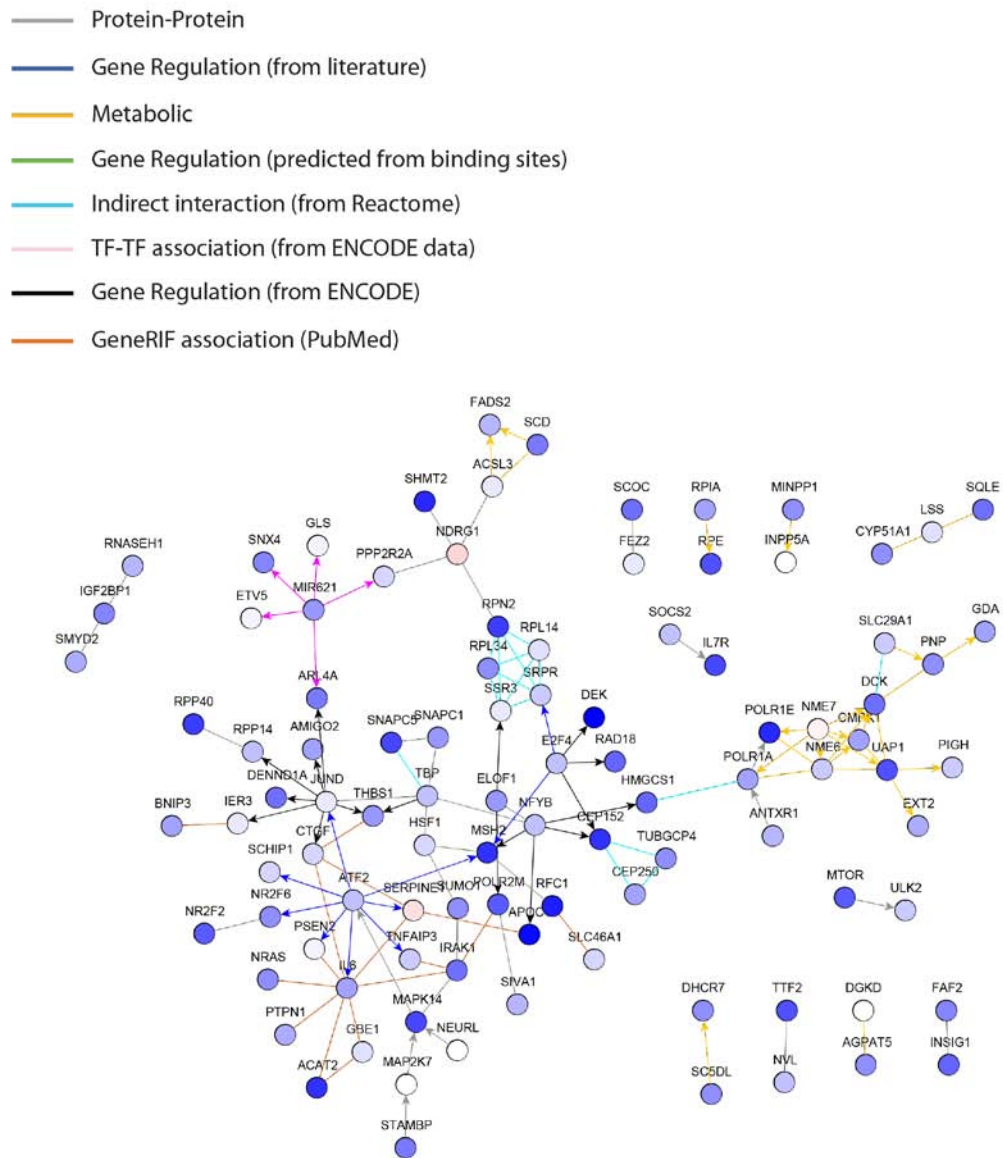

*Log DEKsh/NTsh expression in UMSSC1*

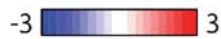

**Supplementary Figure S2: Network 1 is represented, with genes down-regulated in UMSSC1, with log fold change represented. This is the expanded view of the network map highlighted in Figure 1.**



- Protein-Protein
- Gene Regulation (from literature)
- Metabolic
- Gene Regulation (predicted from binding sites)
- Indirect interaction (from Reactome)
- TF-TF association (from ENCODE data)
- Gene Regulation (from ENCODE)
- GeneRIF association (PubMed)

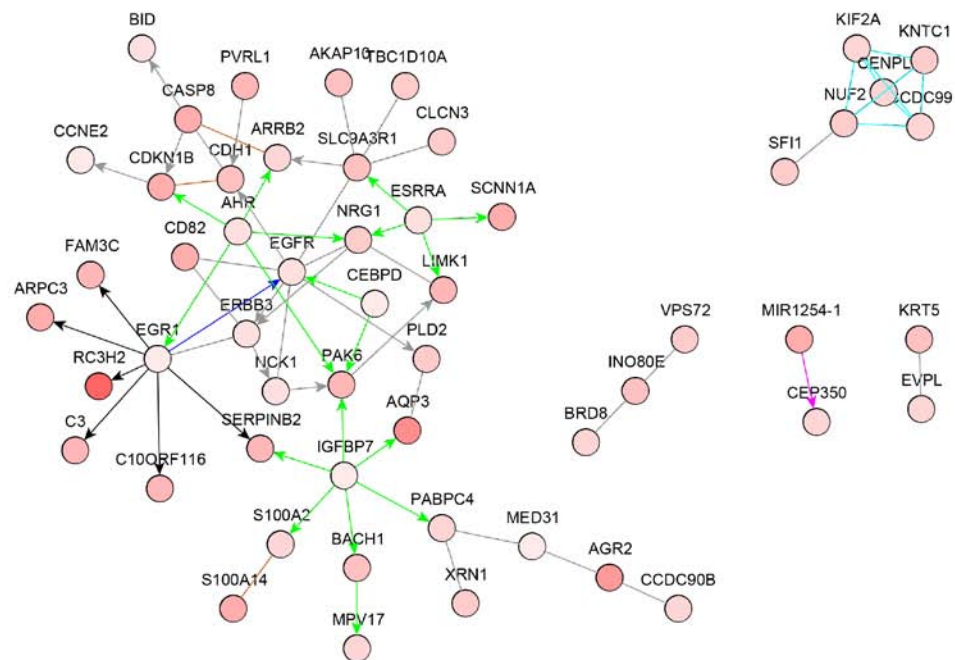

Log DEKsh/NTsh expression in UMSCC47

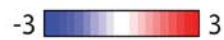

Supplementary Figure S3: Network 2 is represented, with genes up-regulated in UMSCC47, with log fold change represented.

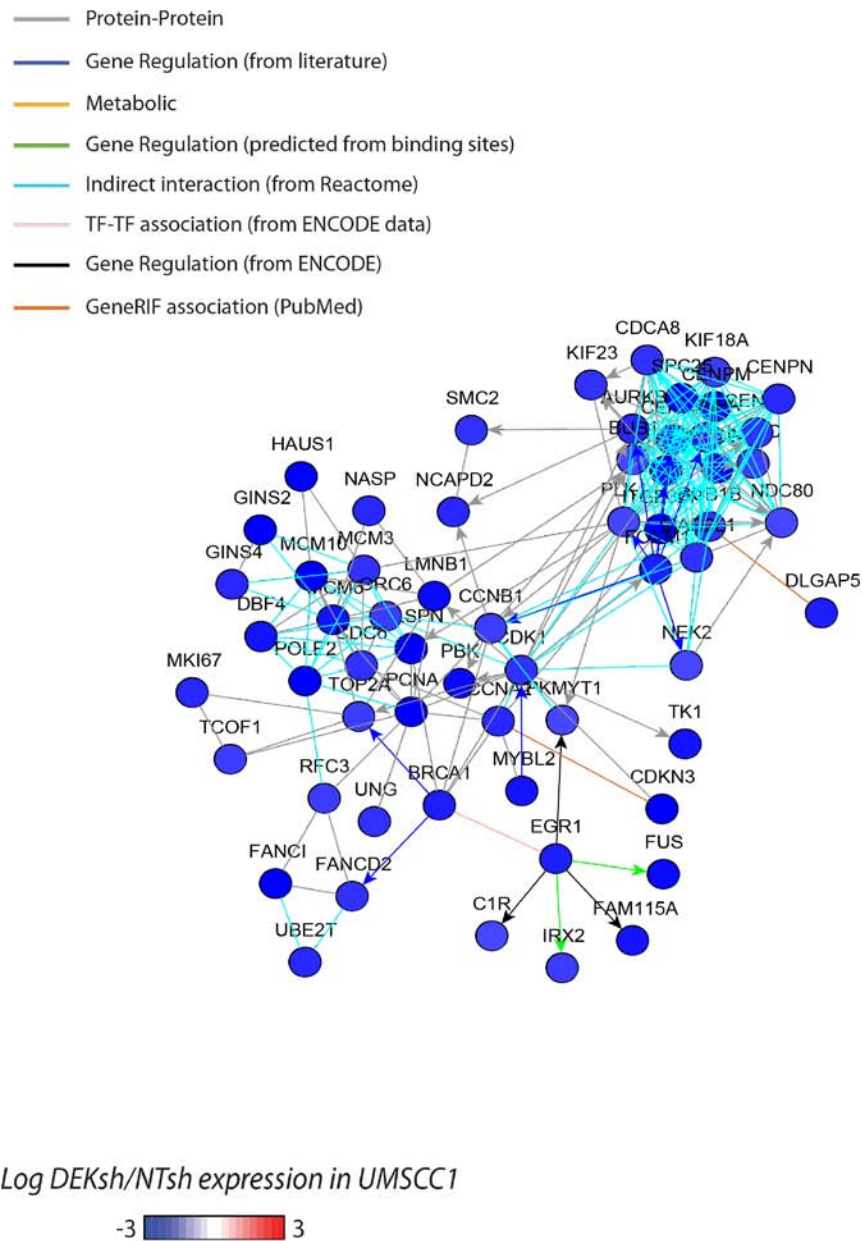

Supplementary Figure S4: Network 3 is represented, with genes down-regulated in UMSCC1, with log fold change represented.

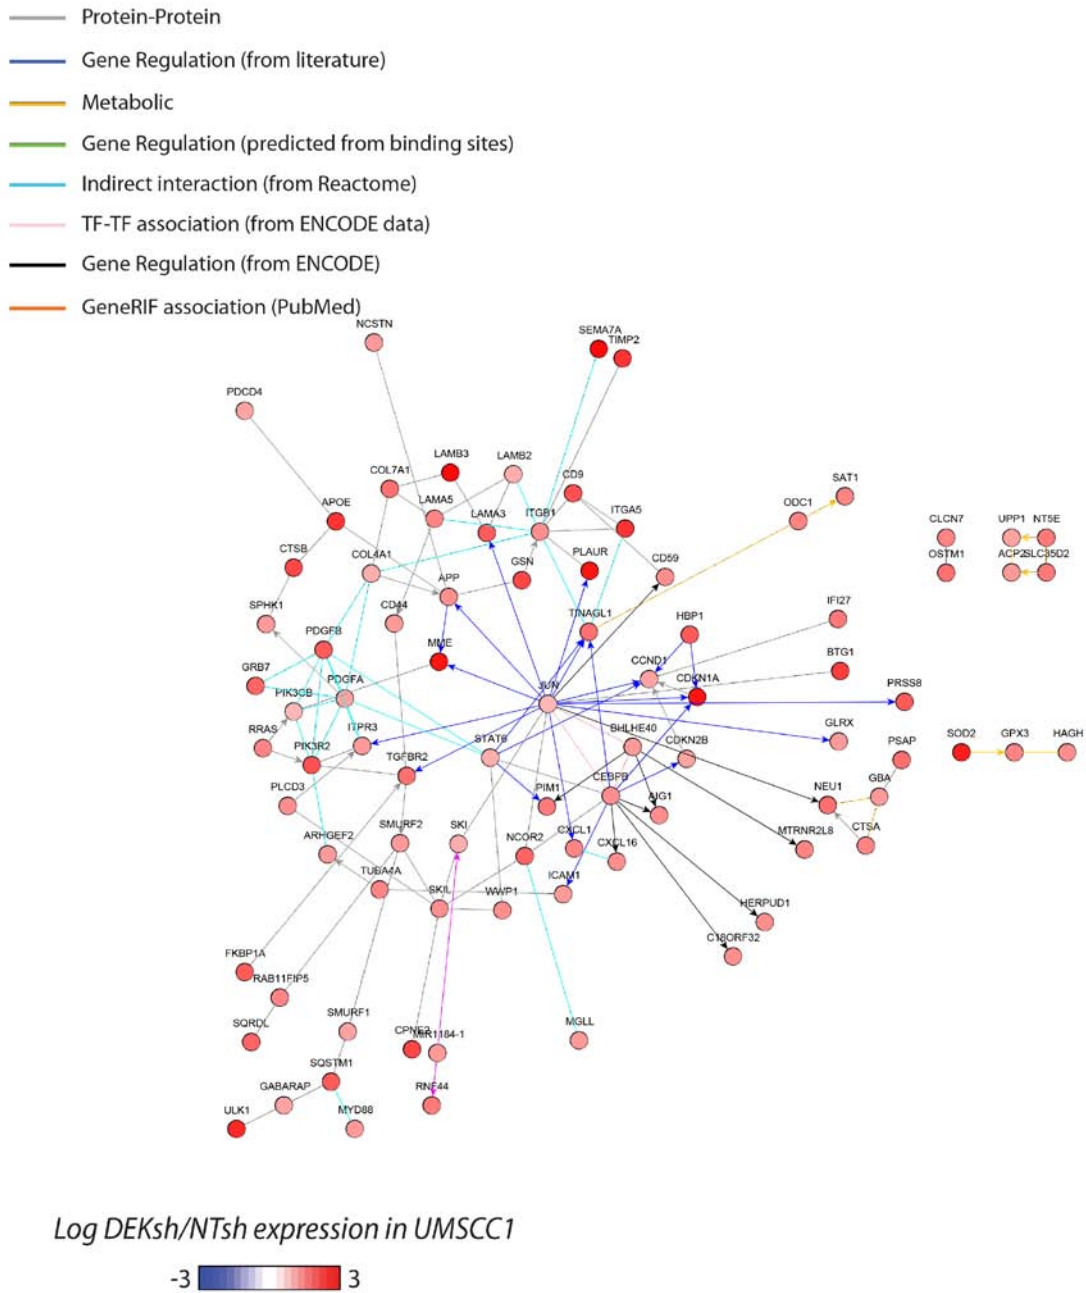

Supplementary Figure S5: Network 4 is represented, with genes up-regulated in UMSCC1, with log fold change represented.

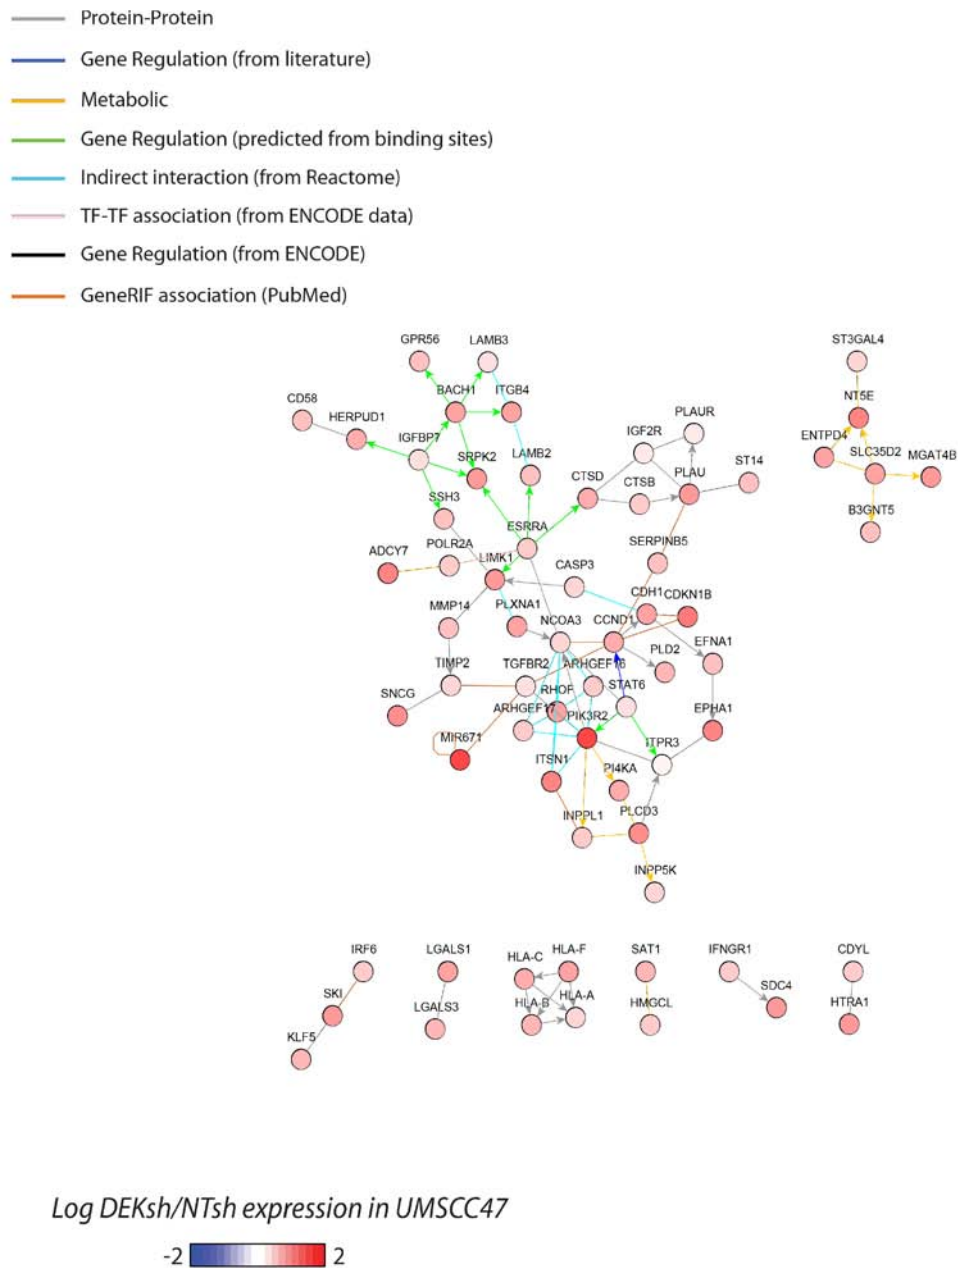

Supplementary Figure S6: Network 5 is represented, with genes up-regulated in UMSCC47, with log fold change represented.

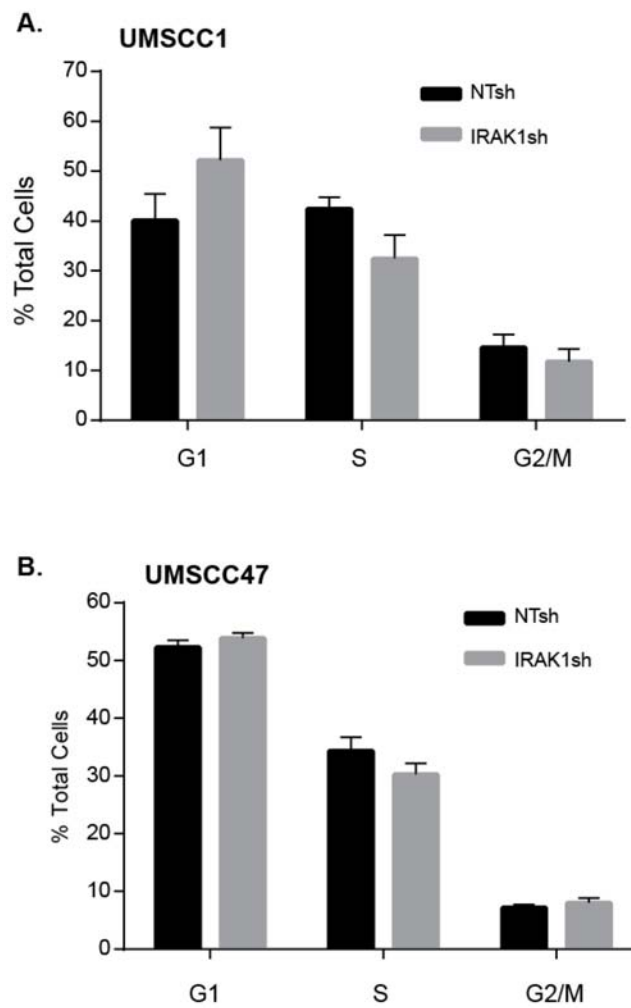

**Supplementary Figure S7: UMSCC1 and UMSCC47 cells with IRAK1 knockdown reveals no alterations in cell cycle profiles.** BrdU incorporation was measured by flow cytometry to determine G1, S, and G2/M populations. Experiments were performed in triplicate.

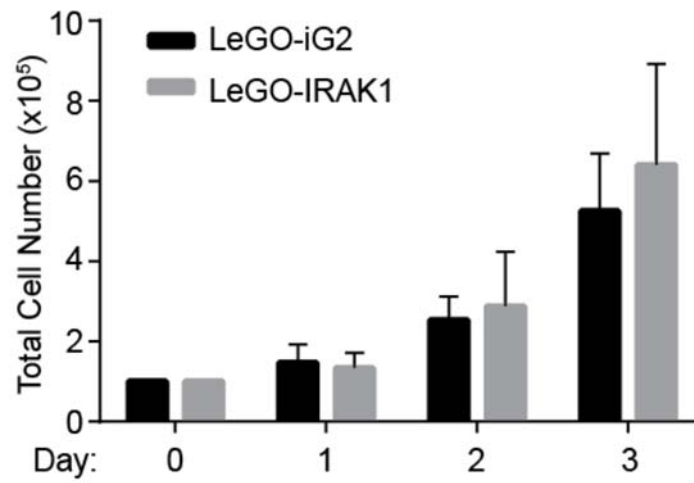

**Supplementary Figure S8: UMSCC1 IRAK1 overexpression cells (IRAK1) do not exhibit cell growth difference over controls (iG2).** Cells were plated at equal densities and counted over three days. Experiments were performed in duplicate.

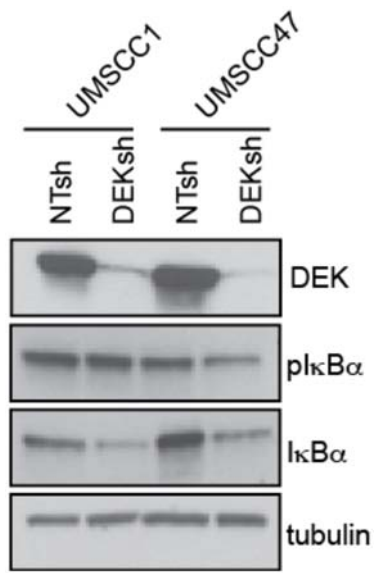

**Supplementary Figure S9: UMSCC1 and UMSCC47 control (NTsh) and DEK-deficient (DEKsh) lysates were analyzed by western blot for phospho and total IκBα. Tubulin was used as a loading control.**
